# Supplementary material
Source: Springer Nature journal article supplement (https://www.springermedizin.de/resource/supplementary/12865_2014_581_MOESM7_ESM.pdf/9428282)

# Antigen presenting cells

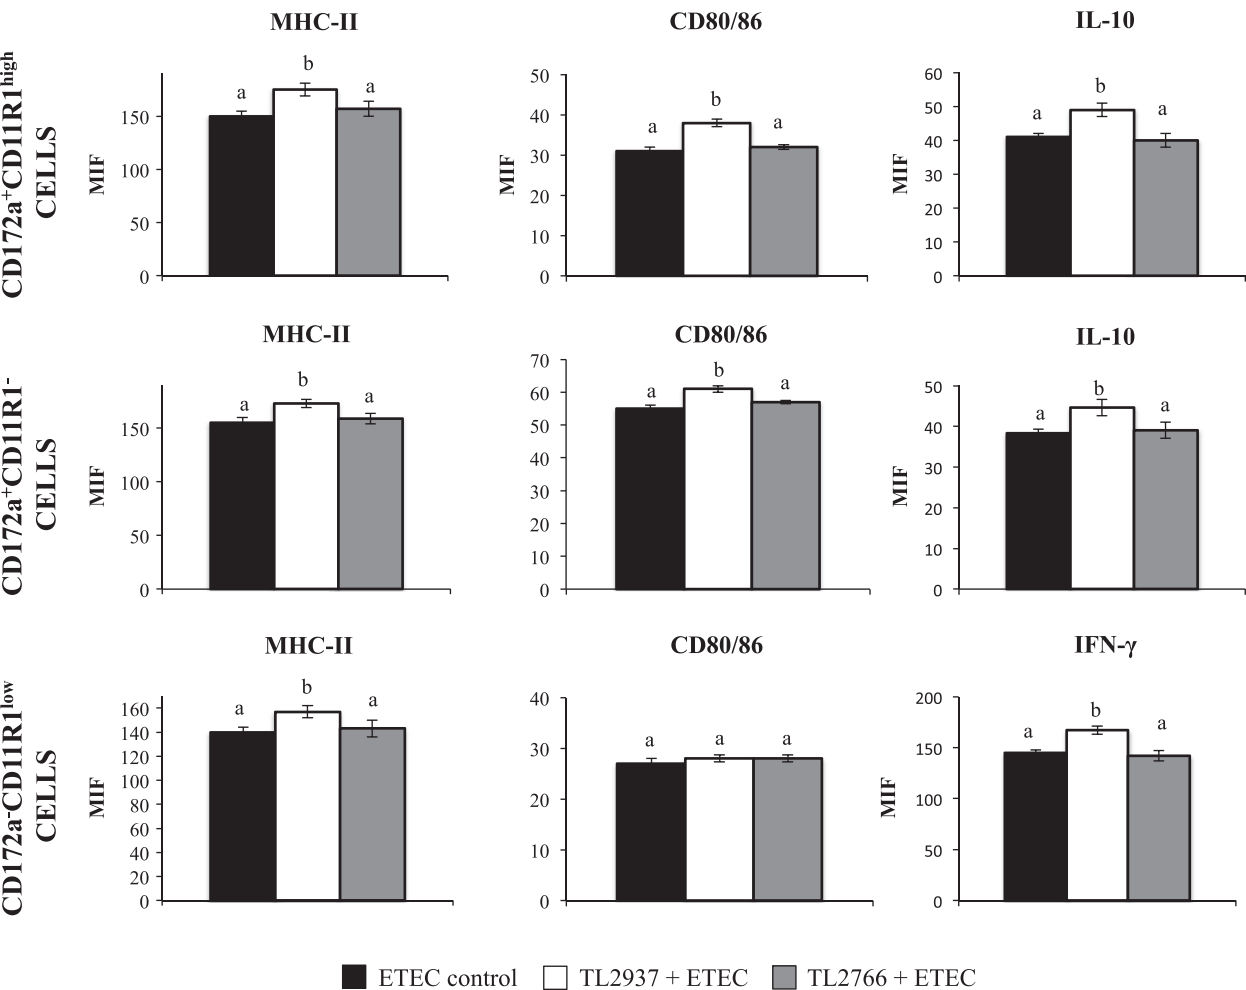

Supplement: MOESM7 [file 9428282]
